# Supplementary material for: FeNi alloys embedded in porous carbon shells on a dual substrate as efficient electrocatalysts for zinc–air batteries
Source: Royal Society of Chemistry journal article supplement (doi:10.1039/d4qi01433b), 2024-01-01
Supplement: d4qi01433b1.pdf [file d4qi01433b1.pdf]

# **FeNi alloys embedded in porous carbon shells on dual-substrate as efficient electrocatalyst for zinc-air batteries**

Han Guo <sup>a</sup>, Guangxu Yao <sup>a</sup>, Chuanzhen Feng <sup>a</sup>, Mi Wang <sup>a</sup>, Huijuan Zhang <sup>\*a,b</sup> and Yu Wang <sup>\*a,b</sup>

<sup>a</sup> *School of Chemistry and Chemical Engineering, Chongqing University, Chongqing, 400044, P. R. China. E-mail: zhanghj@cqu.edu.cn; wangy@cqu.edu.cn*

<sup>b</sup> *College of Chemistry and Environmental Science, Inner Mongolia Normal University, Huhehaote, 010022, P. R. China*

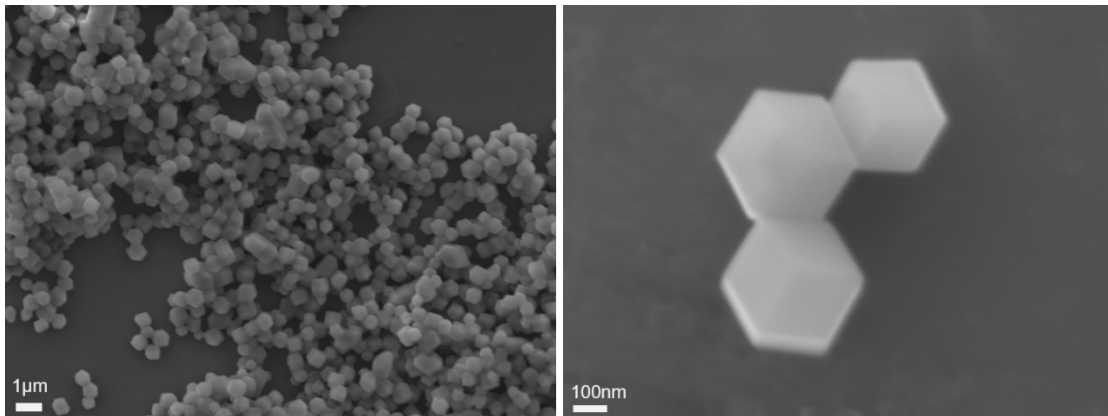

**Fig. S1.** SEM images of ZIF-8 at different magnifications.

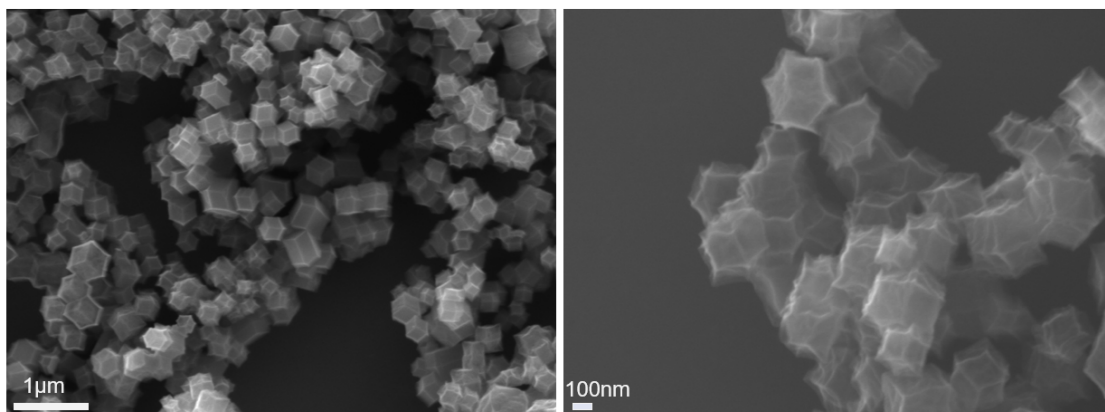

**Fig. S2.** SEM images of NC at different magnifications.

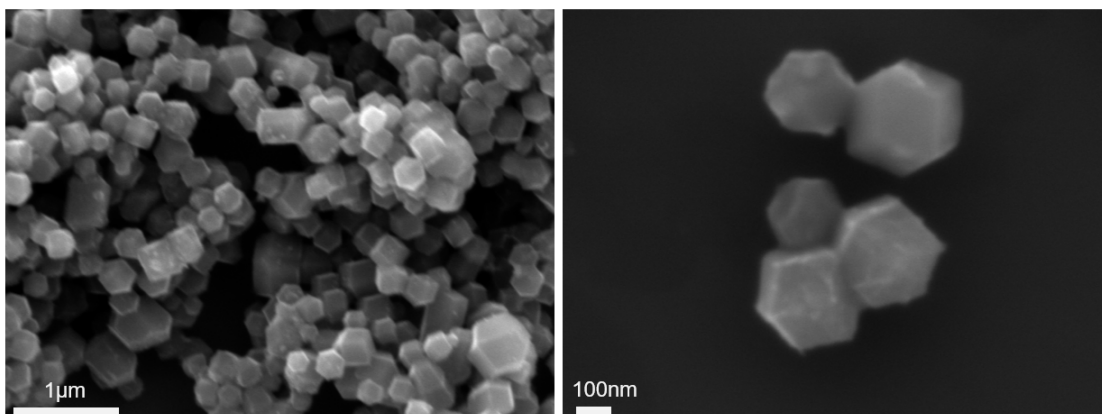

**Fig. S3.** SEM images of FeNi/NC at different magnifications.

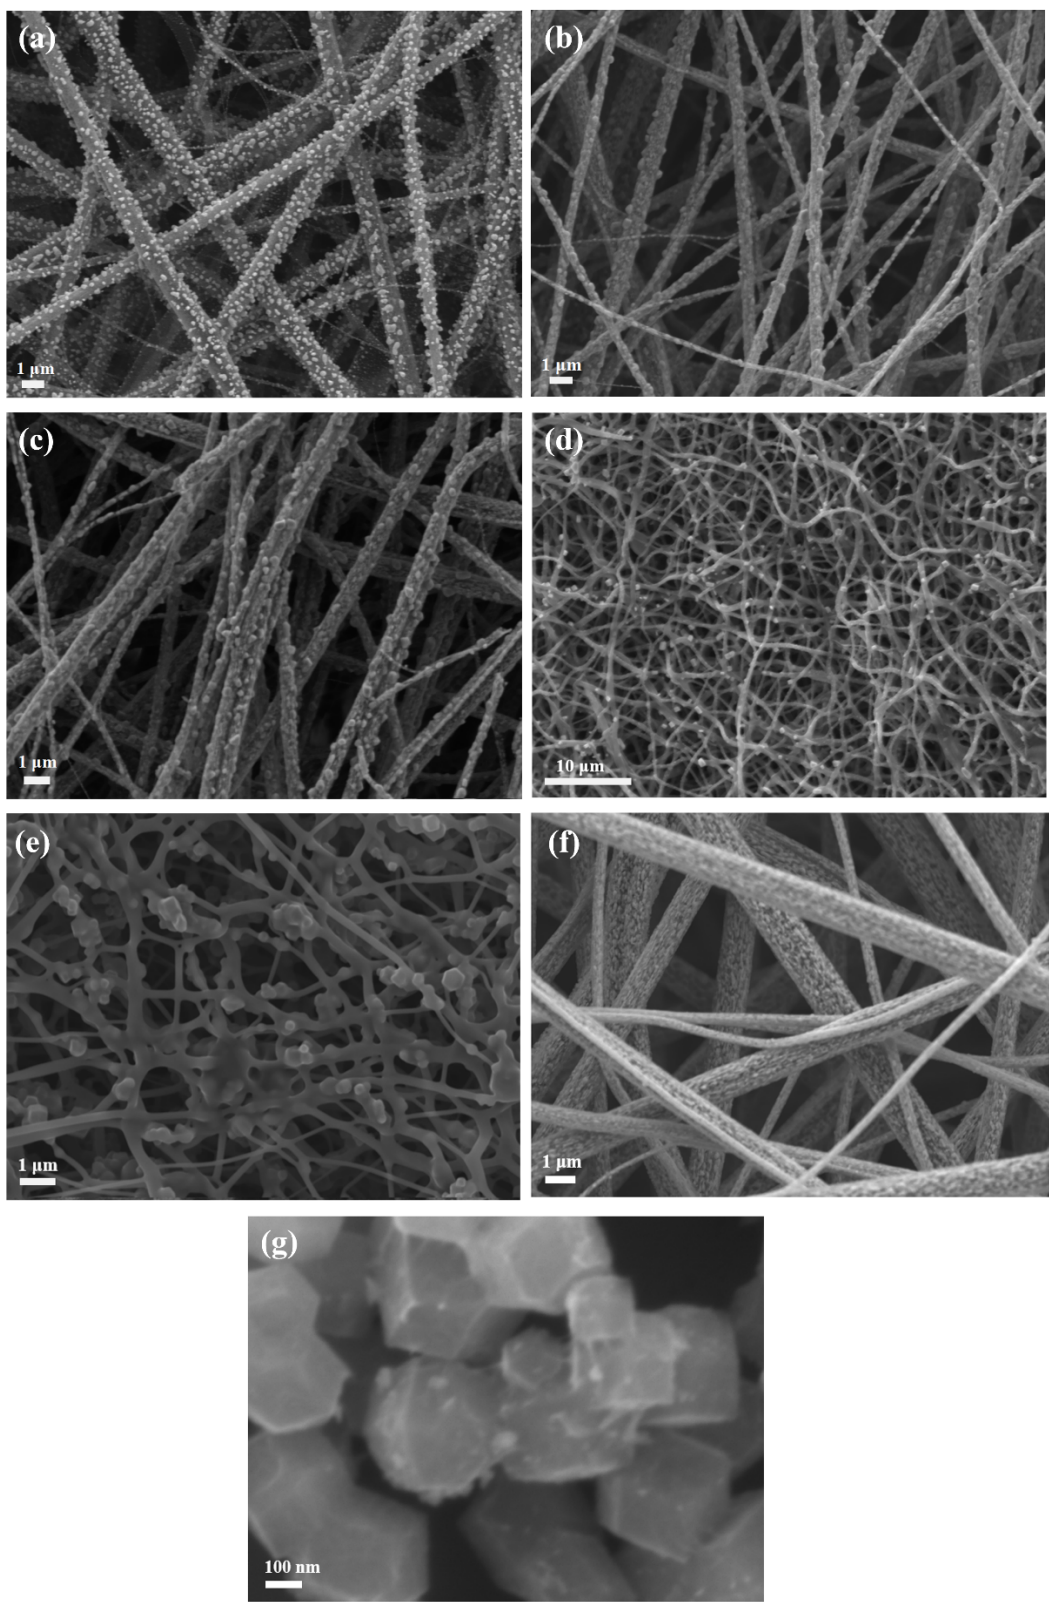

**Fig. S4.** SEM images of (a) FeNi@Ti<sub>4</sub>O<sub>7</sub>-CNFs, (b) Ni/NC@Ti<sub>4</sub>O<sub>7</sub>-CNFs, (c) Fe/NC@Ti<sub>4</sub>O<sub>7</sub>-CNFs, (d) NC@Ti<sub>4</sub>O<sub>7</sub>-CNFs, (e) FeNi/NC-CNFs, (f) Ti<sub>4</sub>O<sub>7</sub>-CNFs and (g) FeNi/NC.

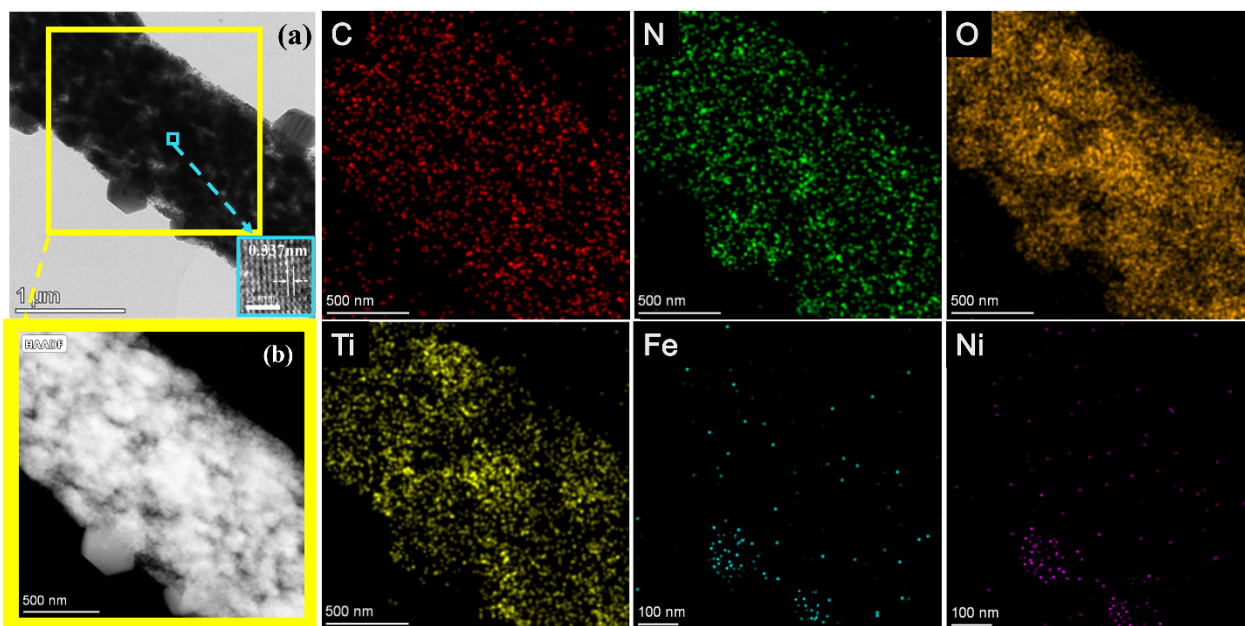

**Fig. S5.** (a) TEM images of FeNi/NC@Ti<sub>4</sub>O<sub>7</sub>-CNFs. (a) Inset, dot-matrix striped image of labeled area. (b) HAADF-STEM image, and the corresponding FeNi/NC@Ti<sub>4</sub>O<sub>7</sub>-CNFs EDS mapped image.

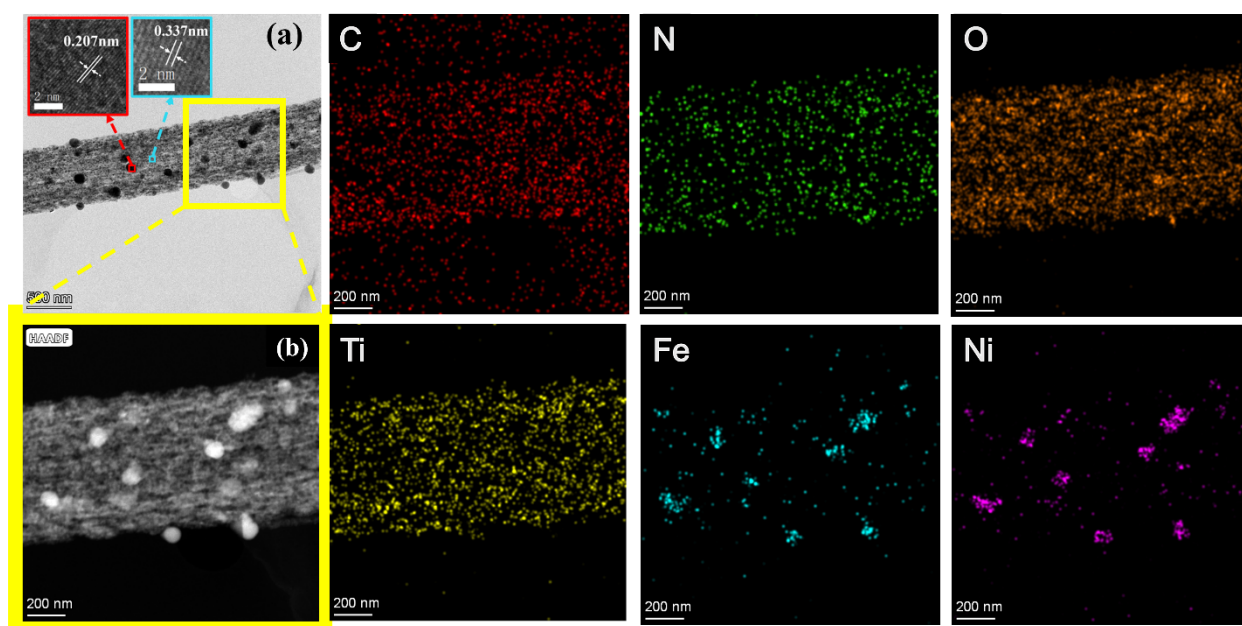

**Fig. S6.** (a) TEM images of FeNi@Ti<sub>4</sub>O<sub>7</sub>-CNFs. (a) Inset, dot-matrix striped image of labeled area. (b) HAADF-STEM image, and the corresponding FeNi@Ti<sub>4</sub>O<sub>7</sub>-CNFs EDS mapped image.

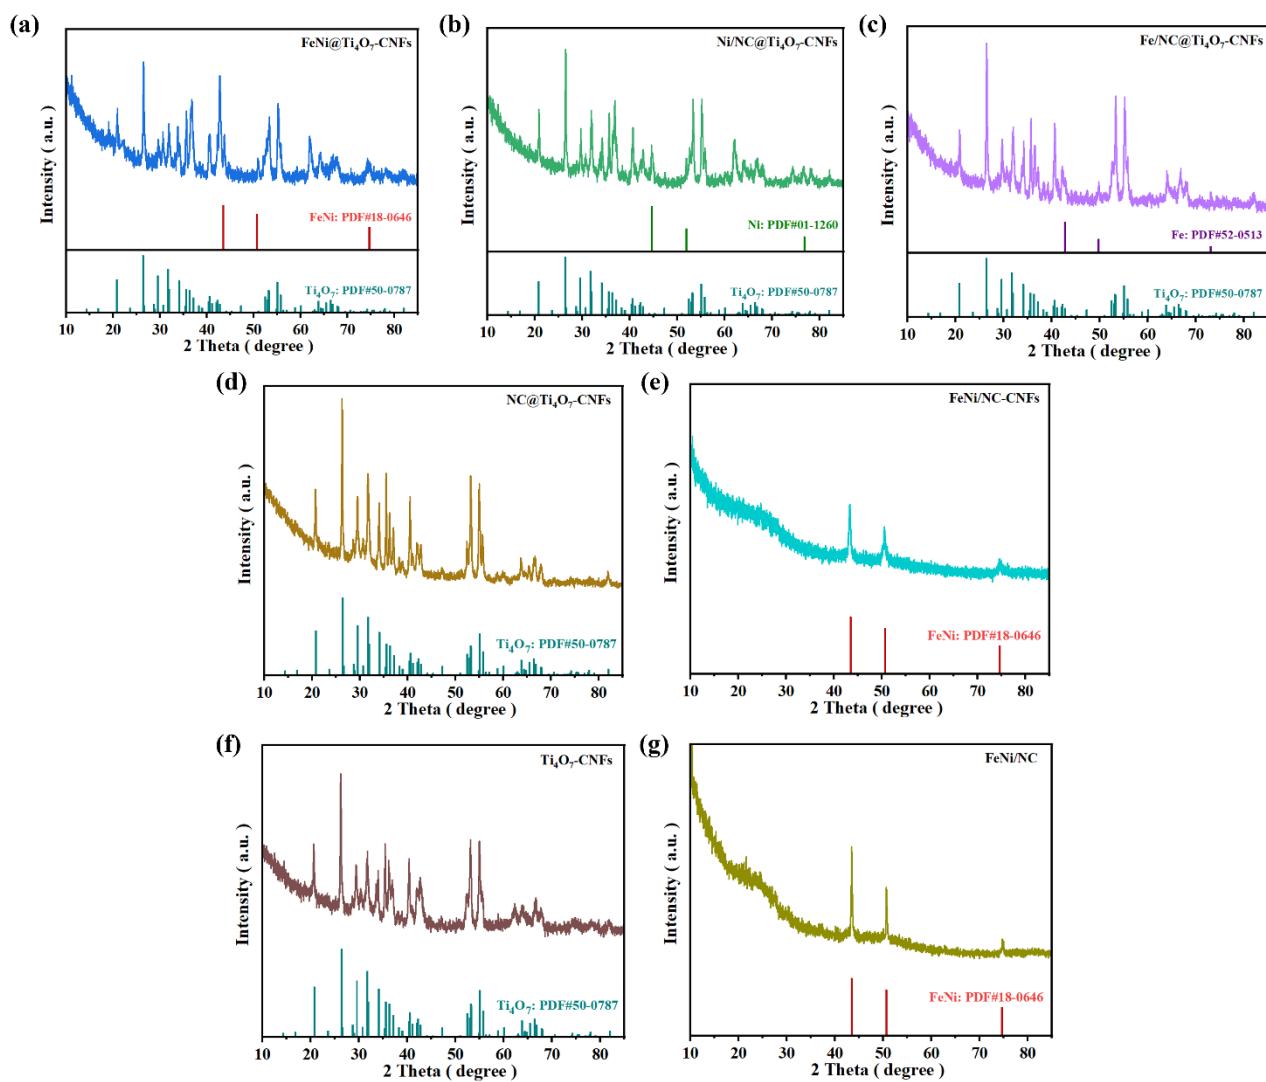

**Fig. S7.** XRD patterns of (a) FeNi@Ti<sub>4</sub>O<sub>7</sub>-CNFs, (b) Ni/NC@Ti<sub>4</sub>O<sub>7</sub>-CNFs, (c) Fe/NC@Ti<sub>4</sub>O<sub>7</sub>-CNFs, (d) NC@Ti<sub>4</sub>O<sub>7</sub>-CNFs, (e) FeNi/NC-CNFs, (f) Ti<sub>4</sub>O<sub>7</sub>-CNFs and (g) FeNi/NC.

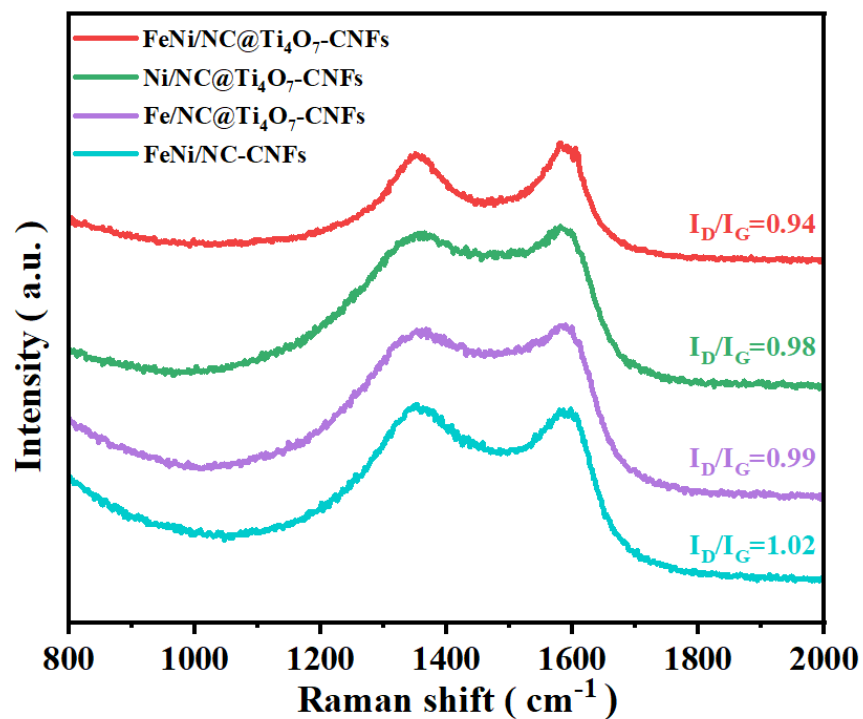

**Fig. S8.** Raman spectra of Ni/NC@Ti<sub>4</sub>O<sub>7</sub>-CNFs, Fe/NC@Ti<sub>4</sub>O<sub>7</sub>-CNFs and FeNi/NC-CNFs.

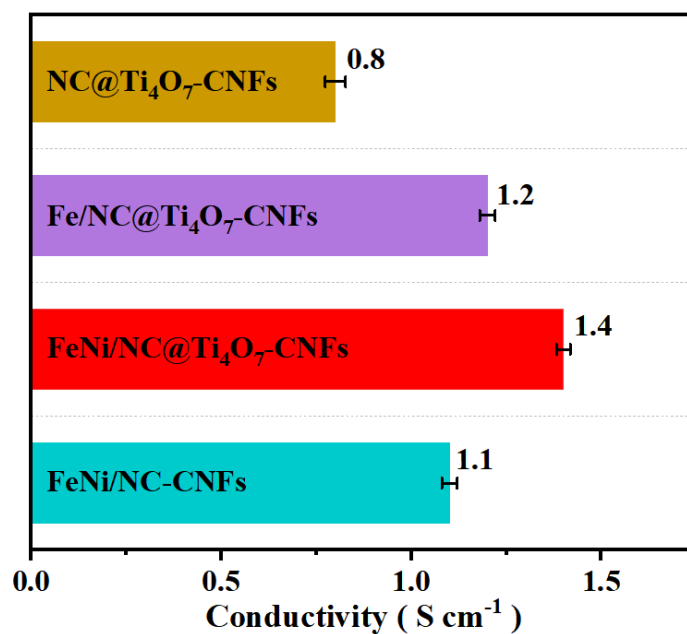

**Fig. S9.** The conductivity of FeNi/NC-CNFs, FeNi/NC@Ti<sub>4</sub>O<sub>7</sub>-CNFs, Fe/NC@Ti<sub>4</sub>O<sub>7</sub>-CNFs and NC@Ti<sub>4</sub>O<sub>7</sub>-CNFs. Error bars indicate at least three independent measurements of the same catalyst.

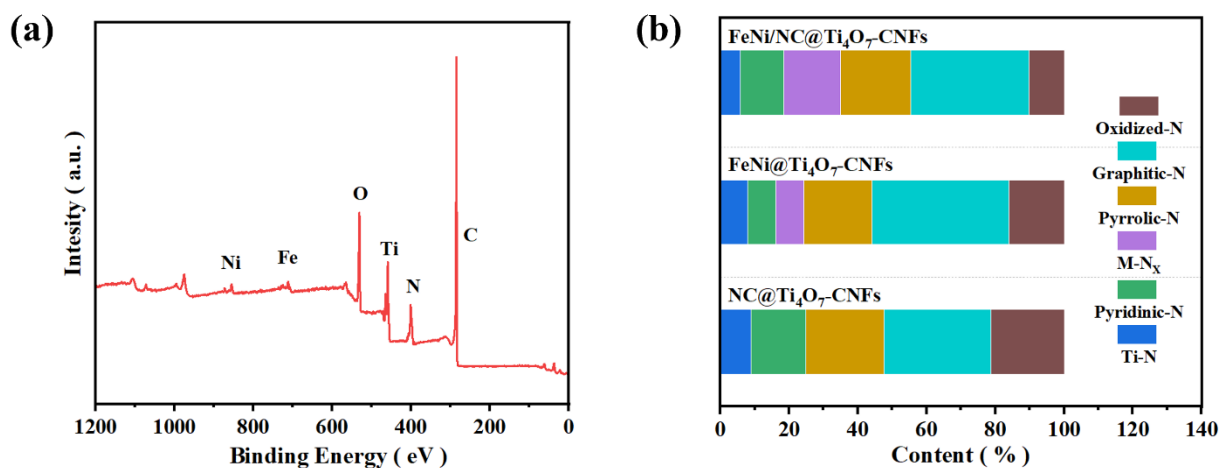

**Fig. S10.** (a) XPS full measurement spectra of FeNi/NC@Ti<sub>4</sub>O<sub>7</sub>-CNFs. (b) N content of FeNi/NC@Ti<sub>4</sub>O<sub>7</sub>-CNFs, FeNi@Ti<sub>4</sub>O<sub>7</sub>-CNFs and NC@Ti<sub>4</sub>O<sub>7</sub>-CNFs.

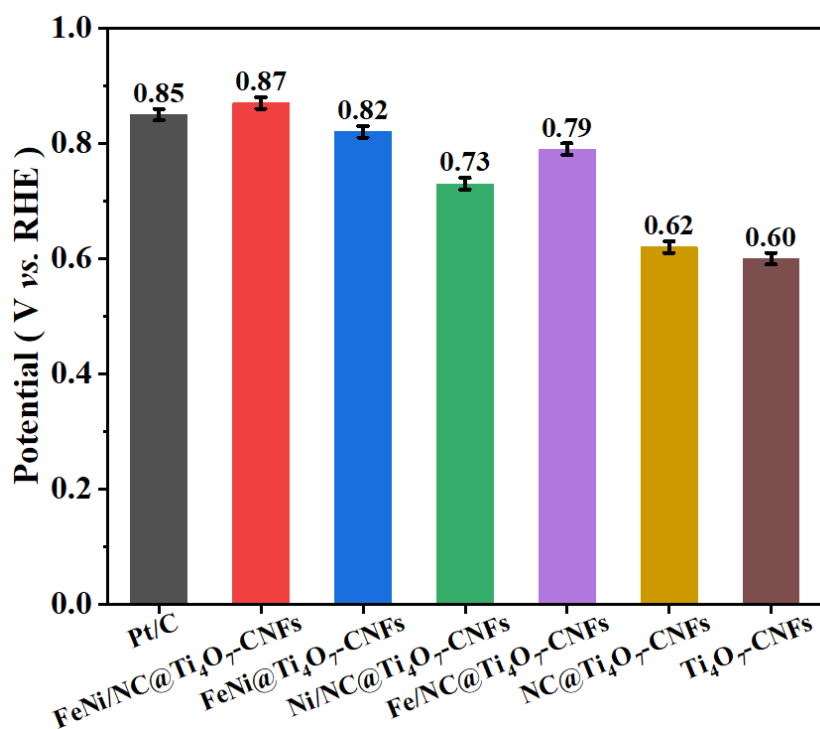

**Fig. S11.** Comparison of half-wave potentials ( $E_{1/2}$ ) for different catalysts. Error bars indicate at least three independent measurements for the same catalyst.

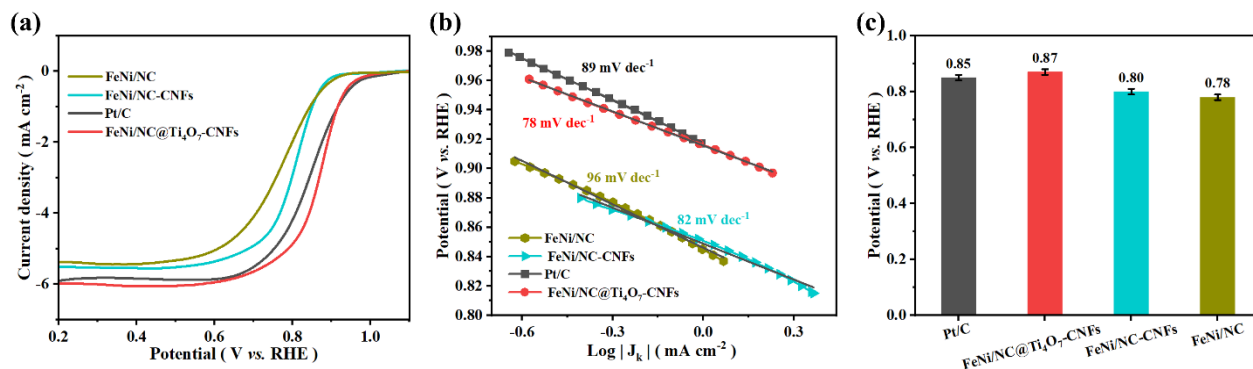

**Fig. S12.** (a) LSV curve of FeNi/NC-CNFs and FeNi/NC in 0.1 M O<sub>2</sub>-saturated KOH solution (1600 rpm). (b) Tafel slope plot. (c) Half-wave potential ( $E_{1/2}$ ). Error bars indicate at least three independent measurements for the same catalyst.

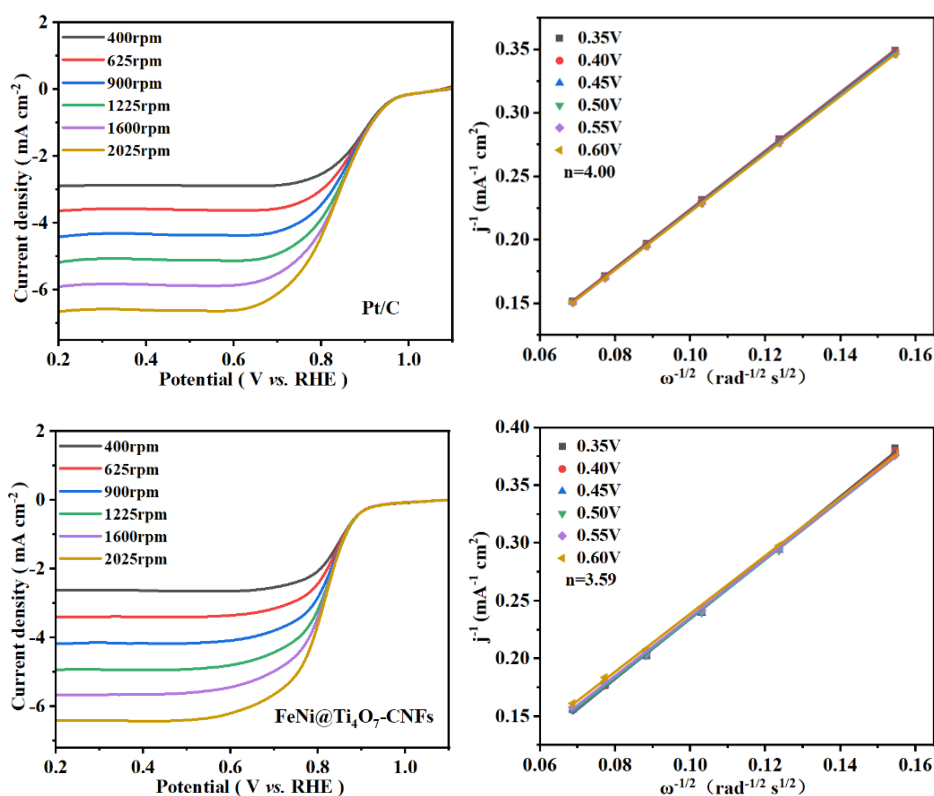



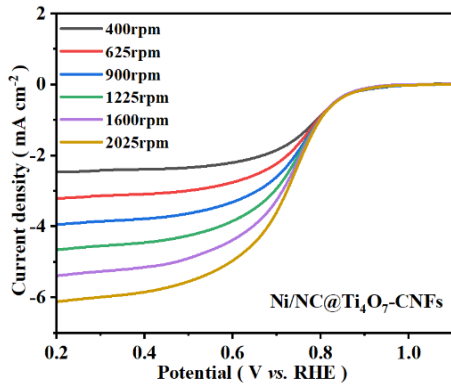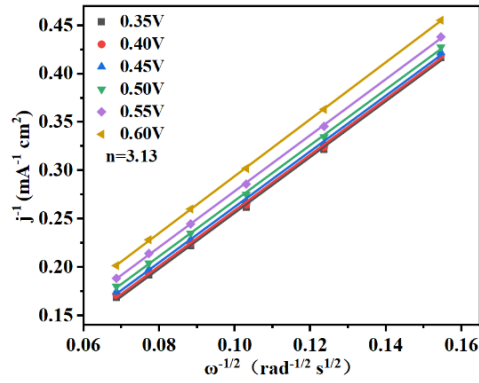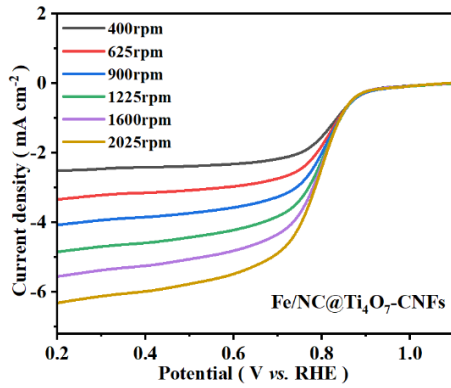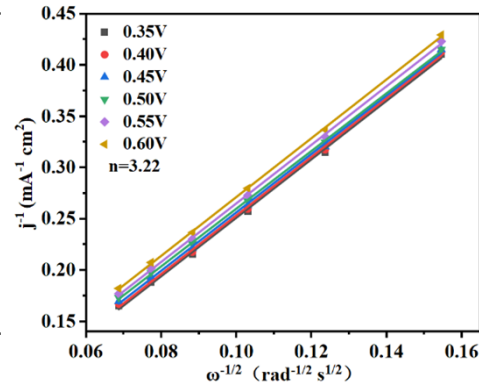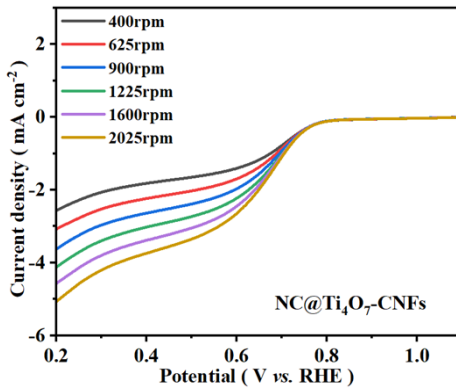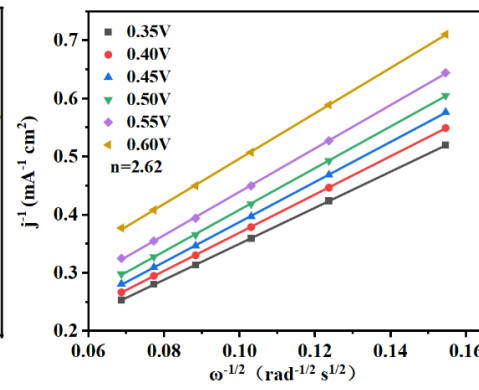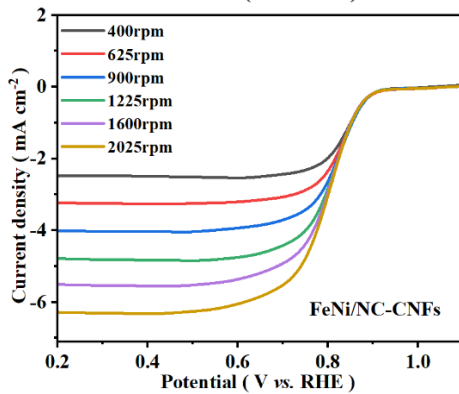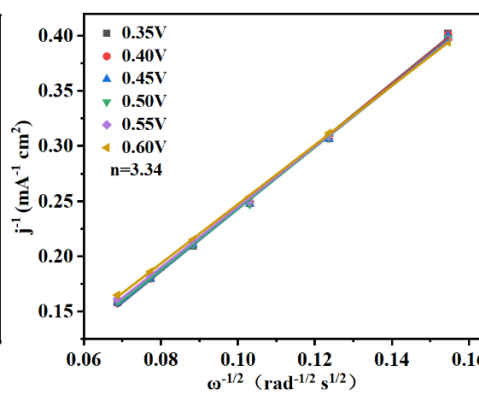

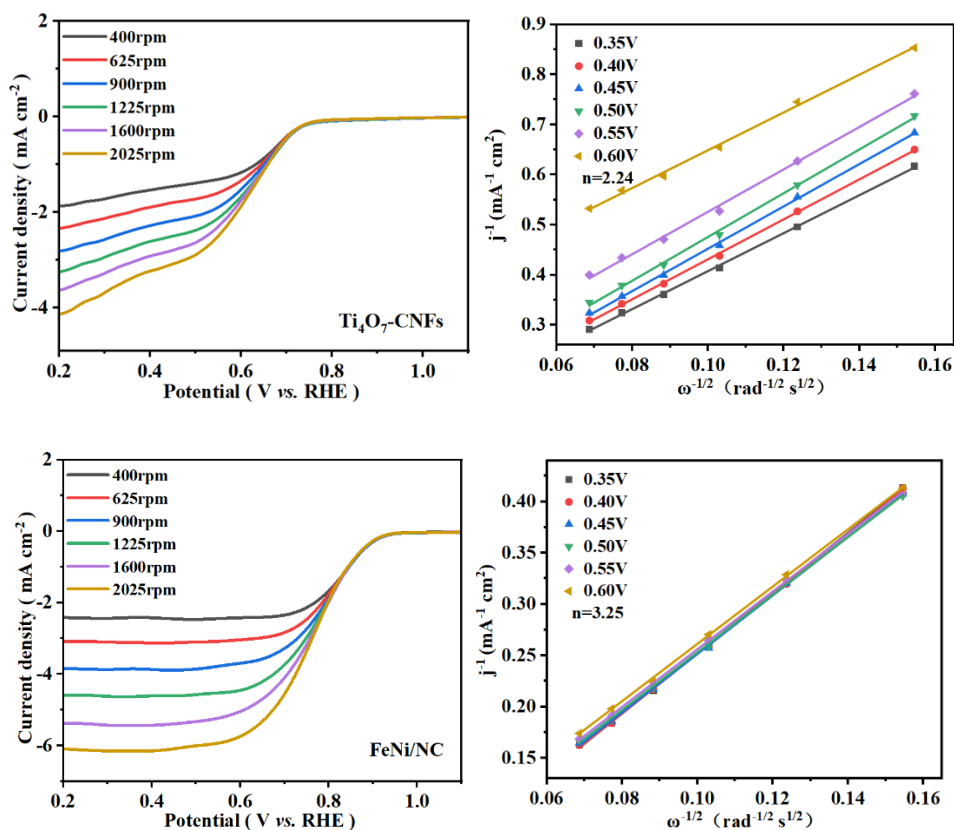

**Fig. S13.** LSV curves of Pt/C, FeNi@ $\text{Ti}_4\text{O}_7\text{-CNFs}$ , Ni/NC@ $\text{Ti}_4\text{O}_7\text{-CNFs}$ , Fe/NC@ $\text{Ti}_4\text{O}_7\text{-CNFs}$ , NC@ $\text{Ti}_4\text{O}_7\text{-CNFs}$ , FeNi/NC-CNFs,  $\text{Ti}_4\text{O}_7\text{-CNFs}$  and FeNi/NC in  $\text{O}_2$ -saturated 0.1 M KOH solution and corresponding Koutecky -Lecich (K-L) plots.

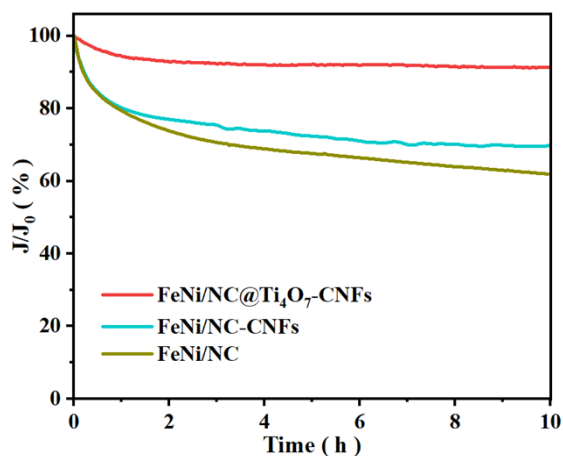

**Fig. S14.** Endurance test at 1 V (vs. RHE) for FeNi/NC-CNFs and FeNi/NC.

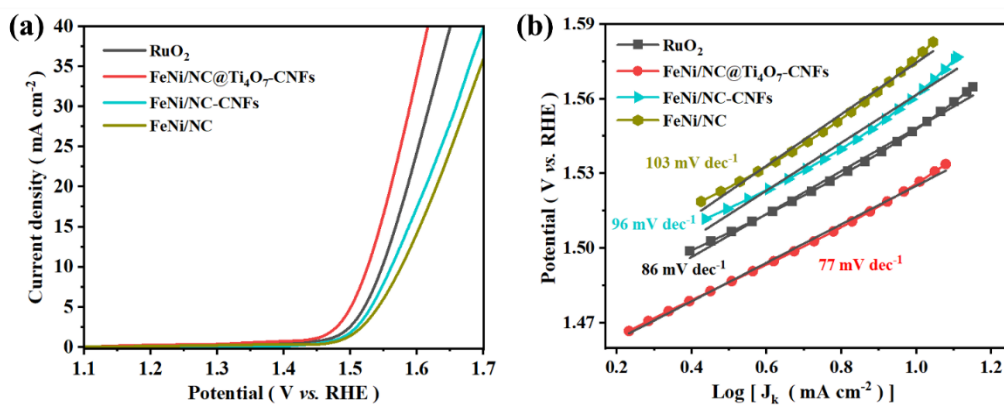

**Fig. S15.** (a) LSV curves of FeNi/NC-CNFs and FeNi/NC in 1 M KOH solution. (b) Tafel slope plot.

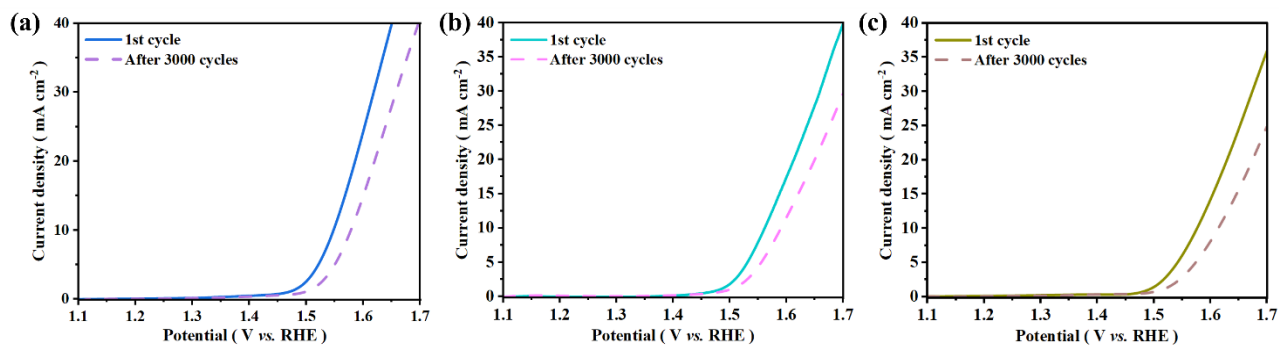

**Fig. S16.** LSV curves before and after 3000 cycles of (a) RuO<sub>2</sub>, (b) FeNi/NC-CNFs and (c) FeNi/NC.

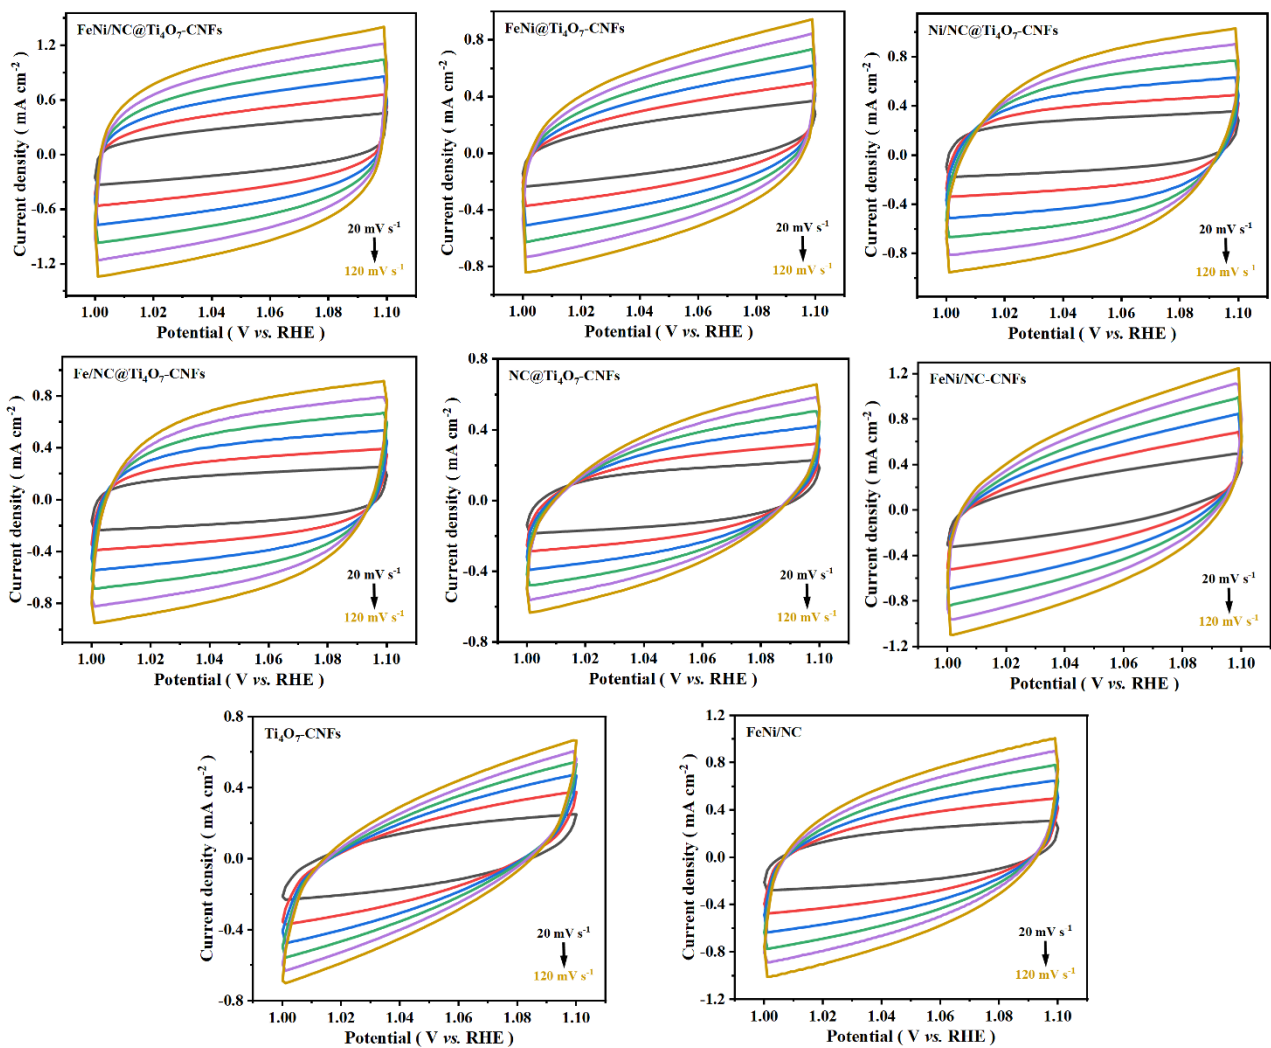

**Fig. S17.** Capacitance CV curves of FeNi/NC@Ti<sub>4</sub>O<sub>7</sub>-CNFs, FeNi@Ti<sub>4</sub>O<sub>7</sub>-CNFs, Ni/NC@Ti<sub>4</sub>O<sub>7</sub>-CNFs, Fe/NC@Ti<sub>4</sub>O<sub>7</sub>-CNFs, NC@Ti<sub>4</sub>O<sub>7</sub>-CNFs, FeNi/NC-CNFs, Ti<sub>4</sub>O<sub>7</sub>-CNFs and FeNi/NC in the non-Faraday region at different scanning rates.

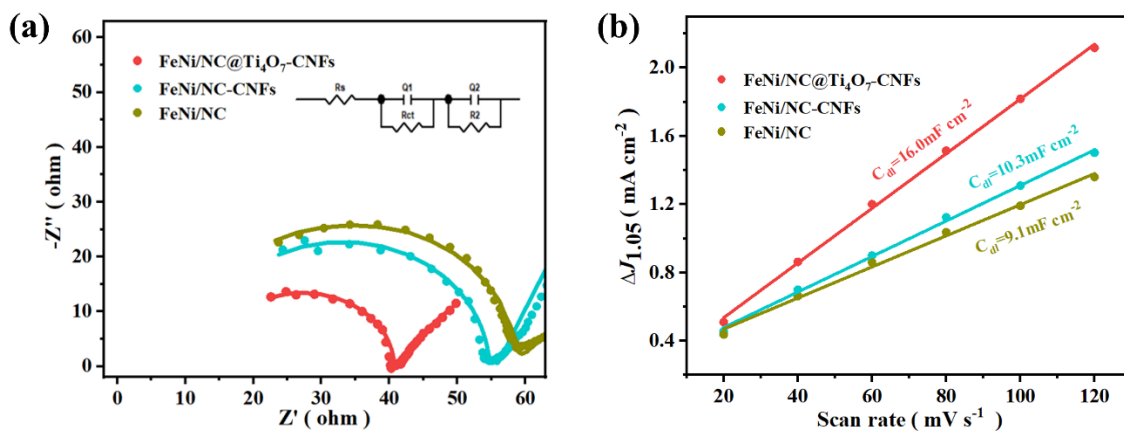

**Fig. S18.** (a) EIS Nyquist plot of FeNi/NC-CNFs and FeNi/NC; (a) Inset, fitted equivalent

circuit diagram. (b) Capacitance current versus scan rate at 1.05 V to assess the  $C_{dl}$  of the catalysts.

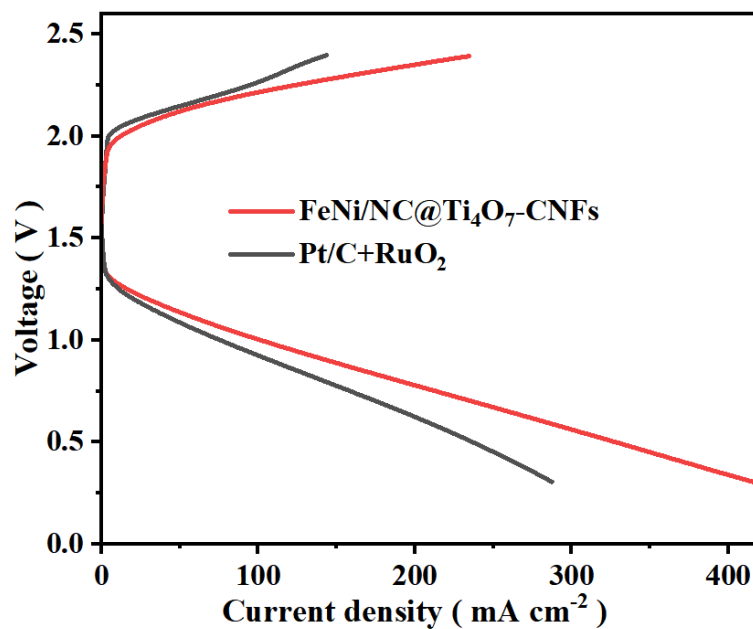

**Fig. S19.** Charge-discharge polarization curves of liquid ZABs assembled by FeNi/NC@Ti<sub>4</sub>O<sub>7</sub>-CNFs and Pt/C+RuO<sub>2</sub> hybrid catalysts as air cathodes, respectively.

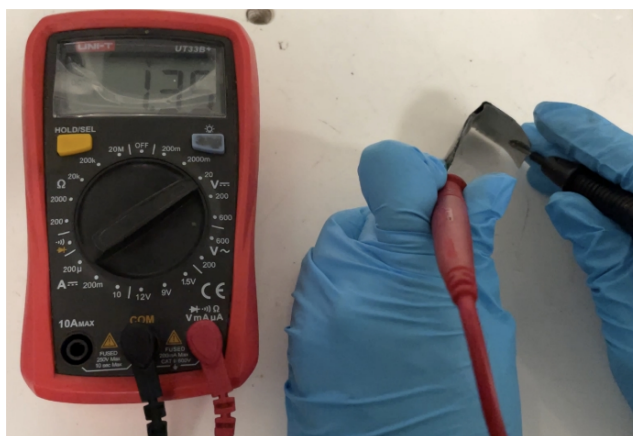

**Fig. S20.** Photograph of the open-circuit voltage of a flexible solid-state ZAB assembled with FeNi/NC@Ti<sub>4</sub>O<sub>7</sub>-CNFs as air cathodes under bending conditions.

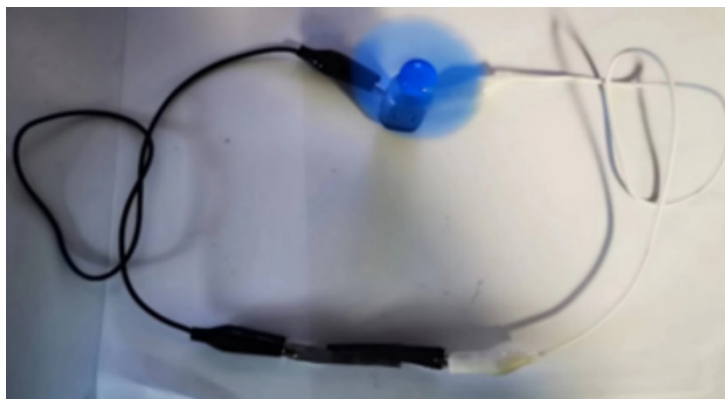

**Fig. S21.** Photograph of a flexible solid-state ZAB assembled with FeNi/NC@Ti<sub>4</sub>O<sub>7</sub>-CNFs as air cathodes used in tandem to power a fan.

**Table S1.** Metal contents of catalysts measured by ICP (at%).

| Samples                                      | Fe   | Ni   |
|----------------------------------------------|------|------|
| FeNi/NC@Ti <sub>4</sub> O <sub>7</sub> -CNFs | 1.37 | 1.34 |
| FeNi@Ti <sub>4</sub> O <sub>7</sub> -CNFs    | 1.56 | 1.53 |
| Ni/NC@Ti <sub>4</sub> O <sub>7</sub> -CNFs   | --   | 2.63 |
| Fe/NC@Ti <sub>4</sub> O <sub>7</sub> -CNFs   | 2.68 | --   |

**Table S2.** Comparison of ORR and OER activities of FeNi/NC@Ti<sub>4</sub>O<sub>7</sub>-CNFs with other previously reported bifunctional electrocatalysts.

| Catalyst                                     | E <sub>1/2</sub> (V vs. RHE) | E <sub>j=10</sub> (V vs. RHE) | ΔE (V) | Ref.      |
|----------------------------------------------|------------------------------|-------------------------------|--------|-----------|
| FeNi/NC@Ti <sub>4</sub> O <sub>7</sub> -CNFs | 0.87<br>(0.1 M KOH)          | 1.526<br>(1 M KOH)            | 0.656  | This work |
| NiFe/Fe,N-CB                                 | 0.8<br>(0.1 M KOH)           | 1.511<br>(1 M KOH)            | 0.71   | 1         |
| Fe-NiNC-50                                   | 0.84<br>(0.1 M KOH)          | 1.57<br>(1 M KOH)             | 0.73   | 2         |

|                                           |                      |                                        |       |    |
|-------------------------------------------|----------------------|----------------------------------------|-------|----|
| NiFe@C@Co CNFs                            | 0.87<br>(0.1 M KOH)  | 1.6<br>(1 M KOH)                       | 0.73  | 3  |
| Fe <sub>0.5</sub> Ni <sub>0.5</sub> @N-GR | 0.69<br>(0.1 M KOH)  | 1.44<br>(1 M KOH)                      | 0.75  | 4  |
| FeNi <sub>3</sub> @NC                     | 0.783<br>(0.1 M KOH) | 1.522<br>(1 M KOH)                     | 0.739 | 5  |
| NiFe/Co-N@CNTs                            | 0.87<br>(0.1 M KOH)  | 1.53<br>(1 M KOH)                      | 0.66  | 6  |
| FeNi <sub>3</sub> C <sub>x</sub> -Pd-7%   | 0.80<br>(0.1 M KOH)  | 1.518(E <sub>j=50</sub> )<br>(1 M KOH) | --    | 7  |
| FeNi/NC                                   | 0.807<br>(0.1 M KOH) | 1.576<br>(1 M KOH)                     | 0.769 | 8  |
| FeNi@N-CNT/NCS                            | 0.84<br>(0.1 M KOH)  | 1.59<br>(1 M KOH)                      | 0.75  | 9  |
| FeNiCo@NC-P                               | 0.84<br>(0.1 M KOH)  | 1.54<br>(0.1 M KOH)                    | 0.70  | 10 |
| NiFe/N-CNT                                | 0.75<br>(0.1 M KOH)  | 1.52<br>(0.1 M KOH)                    | 0.77  | 11 |
| Fe-Co-Ni MOF                              | 0.75<br>(0.1 M KOH)  | 1.48<br>(1 M KOH)                      | 0.73  | 12 |

**Table S3.** Comparison of the performance of liquid ZABs assembled with FeNi/NC@Ti<sub>4</sub>O<sub>7</sub>-CNFs with other previously reported bifunctional electrocatalysts.

| Catalyst                                     | OCV (V) | Power density (mW cm <sup>-2</sup> ) | Specific capacity (mAh·g <sub>Zn</sub> <sup>-1</sup> ) | Cycling stability                                 | Ref.      |
|----------------------------------------------|---------|--------------------------------------|--------------------------------------------------------|---------------------------------------------------|-----------|
| FeNi/NC@Ti <sub>4</sub> O <sub>7</sub> -CNFs | 1.52    | 169.5                                | 802.6<br>(5 mA cm <sup>-2</sup> )                      | 320 hours / 960cycles<br>(5 mA cm <sup>-2</sup> ) | This work |
| NiFe/Fe,N-CB                                 | 1.565   | 66                                   | 731.0<br>(5 mA cm <sup>-2</sup> )                      | 280 cycles<br>(5 mA cm <sup>-2</sup> )            | 1         |
| Fe-NiNC-50                                   | 1.41    | 220                                  | 752.14<br>(5 mA cm <sup>-2</sup> )                     | 100 hours<br>(2 mA cm <sup>-2</sup> )             | 2         |
| NiFe@C@Co CNFs                               | 1.44    | 130                                  | 694.0<br>(5 mA cm <sup>-2</sup> )                      | 200 hours<br>(5 mA cm <sup>-2</sup> )             | 3         |

|                                           |       |       |                                       |                                                     |    |
|-------------------------------------------|-------|-------|---------------------------------------|-----------------------------------------------------|----|
| Fe <sub>0.5</sub> Ni <sub>0.5</sub> @N-GR | 1.482 | 85    | 940<br>(5 mA cm <sup>-2</sup> )       | 40 hours<br>(20 mA cm <sup>-2</sup> )               | 4  |
| FeNi <sub>3</sub> @NC                     | 1.48  | 149.7 | 658<br>(10 mA cm <sup>-2</sup> )      | 280 hours<br>(5 mA cm <sup>-2</sup> )               | 5  |
| FeNiCo@NC-P                               | 1.36  | 112.0 | 807<br>(10 mA cm <sup>-2</sup> )      | 130 hours / 130 cycles<br>(10 mA cm <sup>-2</sup> ) | 13 |
| NiFe@N-CFs                                | 1.40  | 102   | 719<br>(5 mA cm <sup>-2</sup> )       | 100 hours / 300 cycles<br>(10 mA cm <sup>-2</sup> ) | 14 |
| Ni <sub>3</sub> Fe/Co-N-C                 | 1.39  | 68    | --                                    | 65 hours<br>(10 mA cm <sup>-2</sup> )               | 15 |
| FeNi@NC                                   | 1.49  | 98    | 649<br>(10 mA cm <sup>-2</sup> )      | 240 hours<br>(10 mA cm <sup>-2</sup> )              | 16 |
| FeNi-N-C@FeNi LDH                         | 1.497 | 73.9  | 749.3<br>(10 mA cm <sup>-2</sup> )    | 100 hours / 300 cycles<br>(10 mA cm <sup>-2</sup> ) | 17 |
| FeNi@NC-900                               | 1.4   | 119   | 830.1<br>(10 mA cm <sup>-2</sup> )    | 70 hours<br>(10 mA cm <sup>-2</sup> )               | 18 |
| FeNi <sub>3</sub> @NWC                    | 1.47  | 143   | 805<br>(5 mA cm <sup>-2</sup> )       | 800 cycles<br>(5 mA cm <sup>-2</sup> )              | 19 |
| FeNi-NCS-2                                | 1.43  | 109.8 | 639.71<br>(20 mA · cm <sup>-2</sup> ) | 130 cycles<br>(10 mA cm <sup>-2</sup> )             | 20 |



## Supplementary References

1. Y. Y. Wang, Y. P. Gao, L. X. Ma, Y. Z. Xue, Z. H. Liu, H. L. Cui, N. Zhang and R. B. Jiang, Atomically Dispersed Fe-N<sub>4</sub> Sites and NiFe-LDH Sub-Nanoclusters as an Excellent Air Cathode for Rechargeable Zinc-Air Batteries, *ACS Appl. Mater. Interfaces*, 2023, **15**, 16732-16743.
2. X. F. Zhu, D. T. Zhang, C. J. Chen, Q. R. Zhang, R. S. Liu, Z. H. Xia, L. M. Dai, R. Amal and X. Y. Lu, Harnessing the interplay of Fe-Ni atom pairs embedded in nitrogen-doped carbon for bifunctional oxygen electrocatalysis, *Nano Energy*, 2020, **71**, 104597.
3. X. Chen, J. Pu, X. H. Hu, Y. C. Yao, Y. B. Dou, J. J. Jiang and W. J. Zhang, Janus Hollow Nanofiber with Bifunctional Oxygen Electrocatalyst for Rechargeable Zn-Air Battery, *Small*, 2022, **18**, 2200578.
4. P. T. Liu, D. Q. Gao, W. Xiao, L. Ma, K. Sun, P. X. Xi, D. S. Xue and J. Wang, Self-Powered Water-Splitting Devices by Core-Shell NiFe@N-Graphite-Based Zn-Air Batteries, *Adv. Funct. Mater.*, 2018, **28**, 1706928.
5. X. Xie, H. Peng, K. J. Sun, X. F. Lei, R. Q. Zhu, Z. Zhang, G. F. Ma and Z. Q. Lei, Rational construction of FeNi<sub>3</sub>/N doped carbon nanotubes for high-performance and reversible oxygen catalysis reaction for rechargeable Zn-air battery, *Chem. Eng. J.*, 2023, **452**, 139253.
6. B. Liu, B. W. Yuan, C. Wang, S. J. You, J. Liu, X. Meng, X. Q. Xu, Z. Cai, J. H. Xie and J. L. Zou, Highly-dispersed NiFe alloys in-situ anchored on outer surface of Co, N co doped carbon nanotubes with enhanced stability for oxygen electrocatalysis, *J. Colloid Interface Sci.*, 2023, **635**, 208-220.
7. T. Z. Li, Y. H. Chen, Z. H. Tang, Z. Liu and C. H. Wang, Palladium nanoparticles supported by metal-organic frameworks derived FeNi<sub>3</sub>C<sub>x</sub> nanorods as efficient oxygen reversible catalysts for rechargeable Zn-Air batteries, *Electrochim. Acta*, 2019, **307**, 403-413.
8. G. L. Li, X. C. Xu, B. B. Yang, S. Cao, X. Y. Wang, X. D. Fu, Y. T. Shi, Y. Yan, X. D. Song and C. Hao, Micelle-template synthesis of a 3D porous FeNi alloy and nitrogen-codoped carbon material as a bifunctional oxygen electrocatalyst, *Electrochim. Acta*, 2020, **331**, 135375.
9. J. T. Ren, L. Chen, Y. S. Wang, W. W. Tian, L. J. Gao and Z. Y. Yuan, FeNi Nanoalloys Encapsulated in N-Doped CNTs Tangled with N-Doped Carbon Nanosheets as Efficient Multifunctional Catalysts for Overall Water Splitting and Rechargeable Zn-Air Batteries, *ACS Sustain. Chem. Eng.*, 2020, **8**, 223-237.
10. D. Z. Ren, J. Ying, M. L. Xiao, Y. P. Deng, J. H. Ou, J. B. Zhu, G. H. Liu, Y. Pei, S. Li, A. M. Jauhar, H. L. Jin, S. Wang, D. Su, A. P. Yu and Z. W. Chen, Hierarchically Porous Multimetal-Based Carbon Nanorod Hybrid as an Efficient Oxygen Catalyst for Rechargeable Zinc-Air Batteries, *Adv. Funct. Mater.*, 2020, **30**, 1908167.
11. H. Lei, Z. L. Wang, F. Yang, X. Q. Huang, J. H. Liu, Y. Y. Liang, J. P. Xie, M. S.

- Javed, X. H. Lu, S. Z. Tan and W. J. Mai, NiFe nanoparticles embedded N-doped carbon nanotubes as high-efficient electrocatalysts for wearable solid-state Zn-air batteries, *Nano Energy*, 2020, **68**, 104293.
12. F. S. Farahani, M. S. Rahmanifar, A. Noori, M. F. El-Kady, N. Hassani, M. Neek-Amal, R. B. Kaner and M. F. Mousavi, Trilayer Metal-Organic Frameworks as Multifunctional Electrocatalysts for Energy Conversion and Storage Applications, *J. Am. Chem. Soc.*, 2022, **144**, 3411-3428.
  13. D. Z. Ren, J. Ying, M. L. Xiao, Y. P. Deng, J. H. Ou, J. B. Zhu, G. H. Liu, Y. Pei, S. Li, A. M. Jauhar, H. L. Jin, S. Wang, D. Su, A. P. Yu and Z. W. Chen, Hierarchically Porous Multimetal-Based Carbon Nanorod Hybrid as an Efficient Oxygen Catalyst for Rechargeable Zinc-Air Batteries, *Adv. Funct. Mater.*, 2020, **30**, 1908167.
  14. Y. L. Niu, X. Teng, S. Q. Gong and Z. F. Chen, A bimetallic alloy anchored on biomass-derived porous N-doped carbon fibers as a self-supporting bifunctional oxygen electrocatalyst for flexible Zn-air batteries, *J. Mater. Chem. A*, 2020, **8**, 13725-13734.
  15. J. B. Tan, T. Thomas, J. X. Liu, L. Yang, L. H. Pan, R. Cao, H. J. Shen, J. C. Wang, J. Liu and M. H. Yang, Rapid microwave-assisted preparation of high-performance bifunctional Ni<sub>3</sub>Fe/Co-N-C for rechargeable Zn-air battery, *Chem. Eng. J.*, 2020, **395**, 125151.
  16. S. Liu, K. Dong, X. Lei, K. Sun, X. Xie, H. Peng and G. Ma, FeNi alloy embedded in three-dimensional nitrogen-doped porous carbon as bifunctional oxygen electrocatalysts for rechargeable Zn-air batteries, *Journal of Energy Storage*, 2024, **89**, 111862.
  17. S. Zhang, L. Yang, T. Yang, Y. Song, M. Jia, J. Yang, Y. Liu, X. Zhou and J. Tang, Pomegranate-like structured FeNi-nanodots@FeNi LDH composite as a high performance bifunctional catalyst for oxygen electrocatalytic reactions in zinc-air batteries, *Composites Communications*, 2023, **44**, 101757.
  18. S.-Q. Deng, Z. Zhuang, C.-A. Zhou, H. Zheng, S.-R. Zheng, W. Yan and J. Zhang, Metal-organic framework derived FeNi alloy nanoparticles embedded in N-doped porous carbon as high-performance bifunctional air-cathode catalysts for rechargeable zinc-air battery, *J. Colloid Interface Sci.*, 2023, **641**, 265-276.
  19. Y. Wang, Y. Y. Liu, L. M. Zhou, P. X. Zhang, X. L. Wu, T. Liu, S. Mehdi, X. J. Guo, J. C. Jiang and B. J. Li, Ni<sub>3</sub>Fe/Ni<sub>3</sub>Fe(OOH)<sub>x</sub> dynamically coupled on wood-derived nitrogen doped carbon as a bifunctional electrocatalyst for rechargeable zinc-air batteries, *J. Mater. Chem. A*, 2023, **11**, 1894-1905.
  20. Z. H. Yao, D. S. Chen, Y. T. Li, Q. Q. Lyu, J. Wang and Q. Zhong, MOF-derived multi-metal embedded N-doped carbon sheets rich in CNTs as efficient bifunctional oxygen electrocatalysts for rechargeable ZABs, *Int. J. Hydrog. Energy*, 2022, **47**, 984-992.
